# Supplementary material
Source: publisher site journal article supplement (https://www.dovepress.com/article/509958)
Supplement: Supplementary file 1 [file get_supplementary_file.php]

**Addendum**

**Weiner’s classification**

Radiographic scoring system for osteoarthritis of the lumbosacral spine, intervertebral disc:

0 = no disease. Defined by normal disc height, no spur formation, no eburnation, and no gas present.

1 = mild disease. Defined by < 25% disc-space narrowing, small spur formation, minimal eburnation, and no gas present.

2 = moderate disease. Defined by 25–75% disc-space narrowing, moderate spur formation, moderate eburnation, and no gas present.

3 = advanced disease. Defined by > 75% disc-space narrowing, large spur formation, marked eburnation, and gas present

**Meyerding classification (1932)**

**grading the severity**of [spondylolisthesis](https://radiopaedia.org/articles/spondylolisthesis-1?lang=us):

**grade I**: 0-25%

**grade II**: 26-50%

**grade III**: 51-75%

**grade IV**: 76-100%

**grade V**([spondyloptosis](https://radiopaedia.org/articles/spondyloptosis?lang=us)): >100%
